# Supplementary material for: Transmission modes affect the population structure of potato virus Y in potato
Source: PLOS journal article supplement (doi:10.1371/journal.ppat.1008608), 2020-06-23
Supplement: S4 (10.1371/journal.ppat.1008608.s004) [file journal.ppat.1008608.s004]

**S1 Figure. Mapped read depths across the PVY<sup>O</sup> genome.** Each line represents mapped read depth across the genome of the virus for each of the PVY<sup>O</sup> samples in the experiment. Samples are color coded according to the legend below the plot. The mapped read depth values are log<sub>10</sub> transformed.

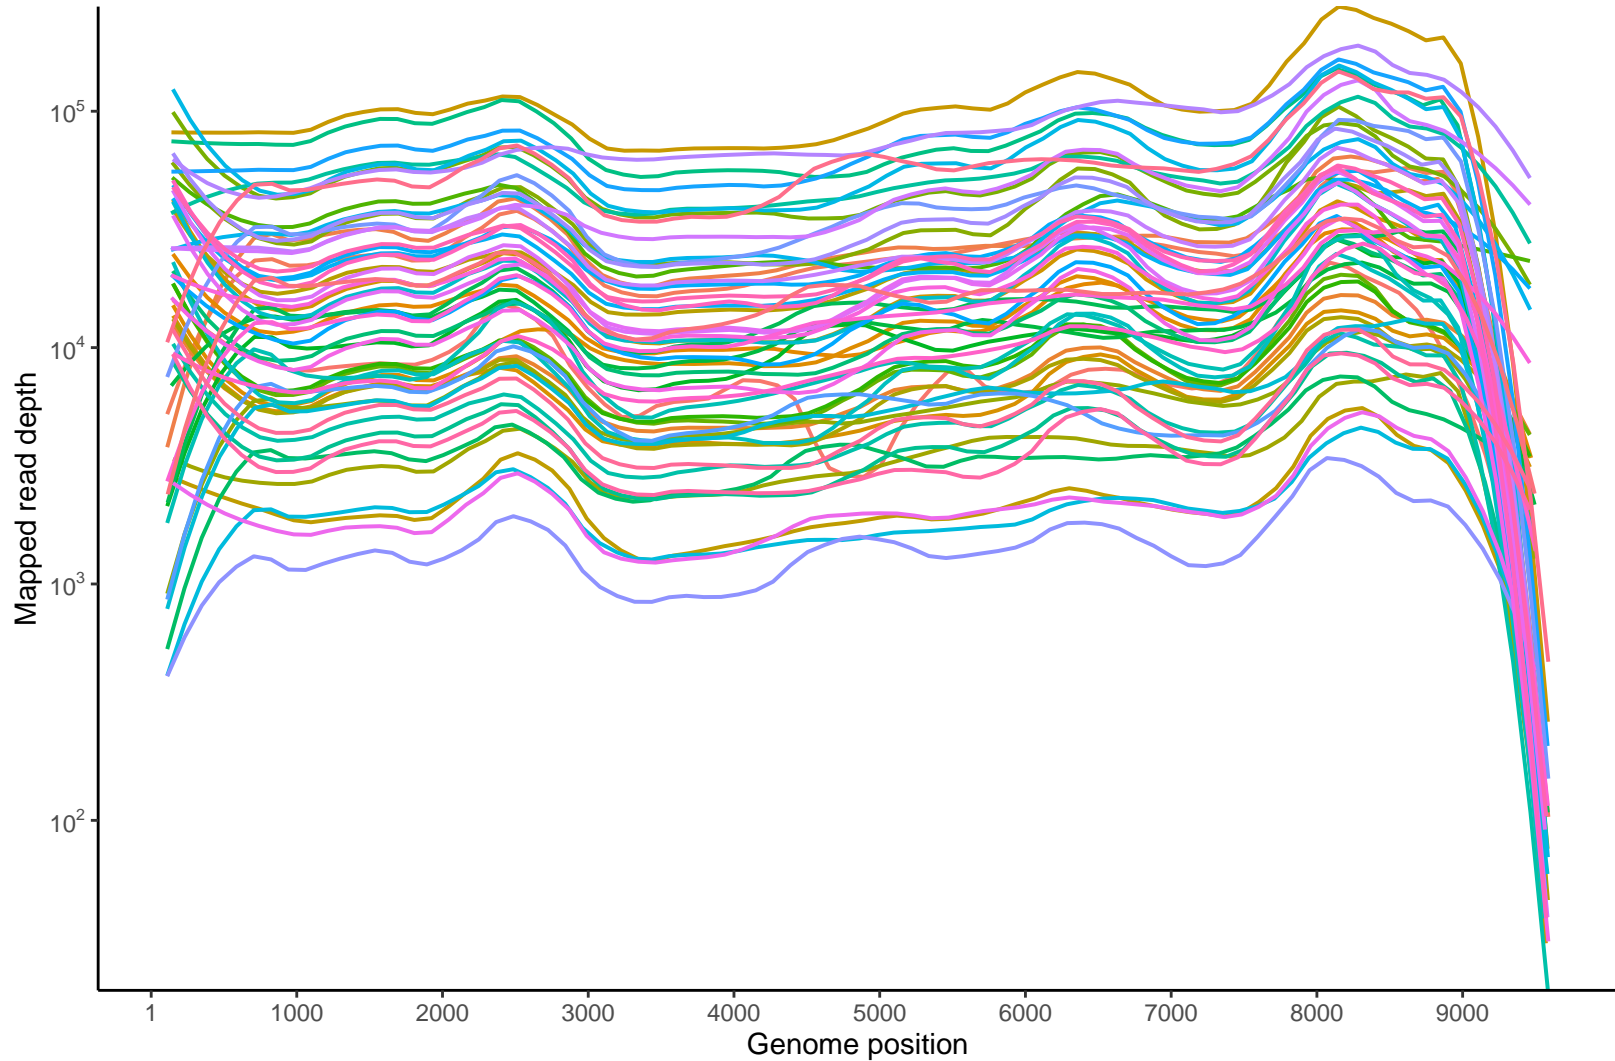

Sample

|              |                 |              |                 |                 |
|--------------|-----------------|--------------|-----------------|-----------------|
| O_founding   | O3_MI1_leaf     | O4_AT2_tuber | O4_MI3_tuber    | O5_IT1_tuber    |
| O3_AT1_leaf  | O3_MI1_tuber    | O4_AT3_leaf  | O4_MI5_leaf     | O5_IT2_leaf     |
| O3_AT1_tuber | O3_MI2_leaf     | O4_AT3_tuber | O4_source_leaf  | O5_IT2_tuber    |
| O3_AT2_leaf  | O3_MI2_tuber    | O4_AT5_leaf  | O4_source_tuber | O5_MI1_leaf     |
| O3_AT2_tuber | O3_MI3_leaf     | O4_IT1_tuber | O5_AT1_leaf     | O5_MI1_tuber    |
| O3_AT3_leaf  | O3_MI3_tuber    | O4_IT2_leaf  | O5_AT1_tuber    | O5_MI2_tuber    |
| O3_AT3_tuber | O3_MI5_leaf     | O4_IT2_tuber | O5_AT2_leaf     | O5_MI3_leaf     |
| O3_AT5_leaf  | O3_source_leaf  | O4_MI1_leaf  | O5_AT2_tuber    | O5_MI3_tuber    |
| O3_IT1_leaf  | O3_source_tuber | O4_MI1_tuber | O5_AT3_leaf     | O5_MI5_leaf     |
| O3_IT1_tuber | O4_AT1_leaf     | O4_MI2_leaf  | O5_AT3_tuber    | O5_source_leaf  |
| O3_IT2_leaf  | O4_AT1_tuber    | O4_MI2_tuber | O5_AT5_leaf     | O5_source_tuber |
| O3_IT2_tuber | O4_AT2_leaf     | O4_MI3_leaf  | O5_IT1_leaf     |                 |
